# Supplementary material for: Intensive training of motor function and functional skills among young children with cerebral palsy: a systematic review and meta-analysis
Source: Springer Nature journal article supplement (doi:10.1186/s12887-014-0292-5), 2014-12-01
Supplement: MOESM3 [file 9746768]

### Appendix III. “Data extraction «Intensive training- a systematic review”

**Primary author, year:**

**Country:**

**Reviewer:**

**Date:**

**Aim of the study:**

**Study population**

|                                    | All participants | Intervention group | Comparator (1) | Comparator (2) |
|------------------------------------|------------------|--------------------|----------------|----------------|
| N (number of participants)         |                  |                    |                |                |
| Age (specify)                      |                  |                    |                |                |
| Gender (Femal/Male)                |                  |                    |                |                |
| CP spastic unilateral (left/right) |                  |                    |                |                |
| CP spastic bilateral               |                  |                    |                |                |
| CP dyskinetic                      |                  |                    |                |                |
| CP ataxic                          |                  |                    |                |                |
| GMFCS level I-V                    |                  |                    |                |                |
| MACS level I-V                     |                  |                    |                |                |
| Other functional descriptions      |                  |                    |                |                |
| Additional CP related impairments  |                  |                    |                |                |

**Comments:**

**Inclusion criteria:**

**Exclusion criteria:**

**Study interventions**

Type of intervention(s) described by authors (short description):

Intervention (I):

Comparator (C1):

Comparator (C2):

Intervention directed towards child, be specific:

Interventions directed towards environment, be specific:

**Setting**

|                     | Intervention | Comparator (1) | Comparator (2) |
|---------------------|--------------|----------------|----------------|
| Home                |              |                |                |
| Kindergarten/school |              |                |                |
| Clinic/center       |              |                |                |
| Other               |              |                |                |

**Comments:**

**Organisation of interventions**

|                                    | Intervention | Comparator (1) | Comparator (2) |
|------------------------------------|--------------|----------------|----------------|
| Individual                         |              |                |                |
| Group                              |              |                |                |
| Incorporated into daily activities |              |                |                |

**Comments:****Involvement in training (describe the role; observer, facilitator, or performer)**

|                       | Intervention<br>(observer/facilitator,<br>performed) | Comparator (1)<br>(observer/facilitator,<br>performed) | Comparator (2)<br>(observer/facilitator,<br>performed) |
|-----------------------|------------------------------------------------------|--------------------------------------------------------|--------------------------------------------------------|
| Parents               |                                                      |                                                        |                                                        |
| Professionals         |                                                      |                                                        |                                                        |
| Others                |                                                      |                                                        |                                                        |
| Supervision of (y/n)  |                                                      |                                                        |                                                        |
| Supervision of others |                                                      |                                                        |                                                        |

**Comments:****Amount of intervention (describe the amount of training performed not according to protocol)**

|                                            | Intervention | Comparator (1) | Comparator (2) |
|--------------------------------------------|--------------|----------------|----------------|
| Duration of intervention (wk/mo)           |              |                |                |
| Frequency of session/ wk or mo             |              |                |                |
| Duration of session (min/h)                |              |                |                |
| Hours/ week                                |              |                |                |
| Frequency of task practicing (home/kinder) |              |                |                |
| Hours/week                                 |              |                |                |

**Comments:**

**Use of goals**

|                                       |                              |              |                |                |
|---------------------------------------|------------------------------|--------------|----------------|----------------|
| <input type="checkbox"/> Not reported | <input type="checkbox"/> Yes | Intervention | Comparator (1) | Comparator (2) |
|                                       | General goals                |              |                |                |
|                                       | Specific goals               |              |                |                |
|                                       | Parent set                   |              |                |                |
|                                       | Therapist set                |              |                |                |
|                                       | Shared goals                 |              |                |                |

**Comments:****Outcome** (activity and participation)

| Outcome | Measurement scale | Scale range |
|---------|-------------------|-------------|
| 1.      |                   |             |
| 2.      |                   |             |
| 3.      |                   |             |
| 4.      |                   |             |

**Comments (mention other outcomes described in the study):**

Drop out, describe:

**Results (present the results in the same order as the outcomes)**

|                                                     | Intervention | Int n | Comparator (1) | Com1 n | Comparator (2) | Comp2 n |
|-----------------------------------------------------|--------------|-------|----------------|--------|----------------|---------|
| Outcome                                             |              |       |                |        |                |         |
| Measurement scale                                   |              |       |                |        |                |         |
| Baseline score                                      |              |       |                |        |                |         |
| Post treatment 1 (SD, p-value)                      |              |       |                |        |                |         |
| Post- treatment 2 (SD, p-value)                     |              |       |                |        |                |         |
| Post- treatment 3 (SD, p-value)                     |              |       |                |        |                |         |
| Effect size- mean difference, adjusted diff (SD/SE) |              |       |                |        |                |         |
| Effect size (CI, p-value)                           |              |       |                |        |                |         |

**Comments (as adjusted for):**

- No adverse effect reported
- Adverse effects, type
- Compliance
